# Supplementary material for: TROP2 overexpression in colorectal liver oligometastases is associated with poor prognosis after liver resection
Source: PubMed Central journal article supplement — Ther Adv Med Oncol. 2019 Dec 31;11:1758835919897543. doi: 10.1177/1758835919897543 (PMC8842308; doi:10.1177/1758835919897543), 2019-12-31
Supplement: Supplemental_Table_1_1.pdf [file Supplemental_Table_1_1.pdf]

**Supplemental Table 1 Clinical characteristics of 30 patients whose fresh colorectal cancer tissues that were analyzed with a microarray**

| Characteristics           | N = 30 (%) |
|---------------------------|------------|
| Age, year (median, range) | 55 (30-70) |
| Gender                    |            |
| Male                      | 16 (53.3)  |
| Female                    | 14 (46.7)  |
| Location                  |            |
| Colon                     | 28 (93.3)  |
| Rectum                    | 2 (6.7)    |
| T stage                   |            |
| 1                         | 3 (10.0)   |
| 2                         | 4 (13.3)   |
| 3                         | 15 (50.0)  |
| 4                         | 8 (26.7)   |
| N stage                   |            |
| 0                         | 15 (50.0)  |
| 1                         | 10 (33.3)  |
| 2                         | 5 (16.7)   |
| TNM stage                 |            |
| I                         | 6 (20.0)   |
| II                        | 6 (20.0)   |
| III                       | 6 (20.0)   |
| IV                        | 12 (40.0)  |

Abbreviations: TNM stage, tumor-node-metastasis classification
